# Supplementary material for: A TPE–benzothiazole piezochromic and acidichromic molecular switch with high solid state luminescent efficiency
Source: Royal Society of Chemistry journal article supplement (doi:10.1039/c7ra12655g), 2018-01-01
Supplement: c7ra12655g1.pdf [file c7ra12655g1.pdf]

## SUPPLEMENTARY INFORMATION FOR

### “A TPE-benzothiazole piezochromic and acidichromic molecular switch with high solid state luminescent efficiency”

**Chunping Ma,<sup>‡ab</sup> Jiajun He,<sup>‡c</sup> Bingjia Xu,<sup>d</sup> Gaoyi Xie,<sup>\*ef</sup> Zongliang Xie,<sup>c</sup> Zhu Mao<sup>c</sup> and Zhenguo Chi<sup>\*\*c</sup>**

<sup>a</sup> Key Laboratory of Light Metal Materials Processing Technology of Guizhou Province, Guizhou Institute of Technology, Guiyang 550003, China.

<sup>b</sup> School of Materials and Metallurgical Engineering, Guizhou Institute of Technology, Guiyang 550003, China.

<sup>c</sup> PCFM Lab, GDHPPC Lab, Guangdong Engineering Technology Research Center for High-performance Organic and Polymer Photoelectric Functional Films, State Key Laboratory of OEMT, School of Chemistry and Chemical Engineering, Sun Yat-sen University, Guangzhou 510275, China. E-mail: chizhg@mail.sysu.edu.cn

<sup>d</sup> Key Laboratory of Theoretical Chemistry of Environment, Ministry of Education, School of Chemistry and Environment, South China Normal University, Guangzhou 510006, China.

<sup>e</sup> College of Chemical Engineering, Guizhou Institute of Technology, Guiyang 550003, China; E-mail: xiegaoyi@126.com

<sup>f</sup> Guizhou Material Industry Technology Research Institute, Guiyang 550014, China. E-mail: xiegaoyi@126.com

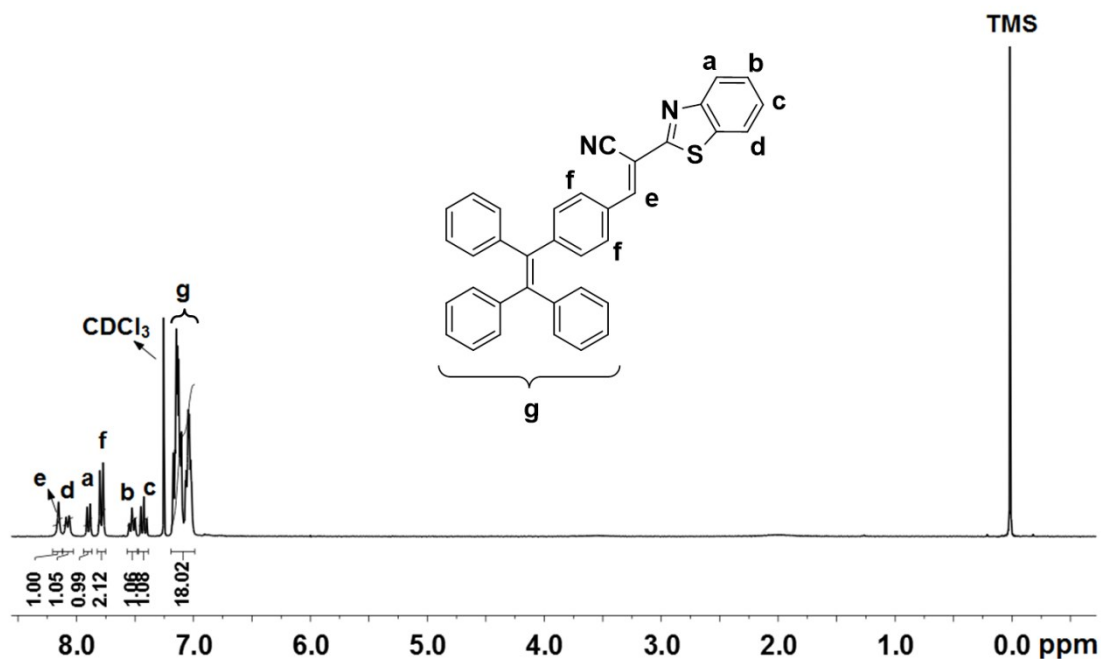

Fig. S1 <sup>1</sup>H-NMR spectrum of B-TPEAN.

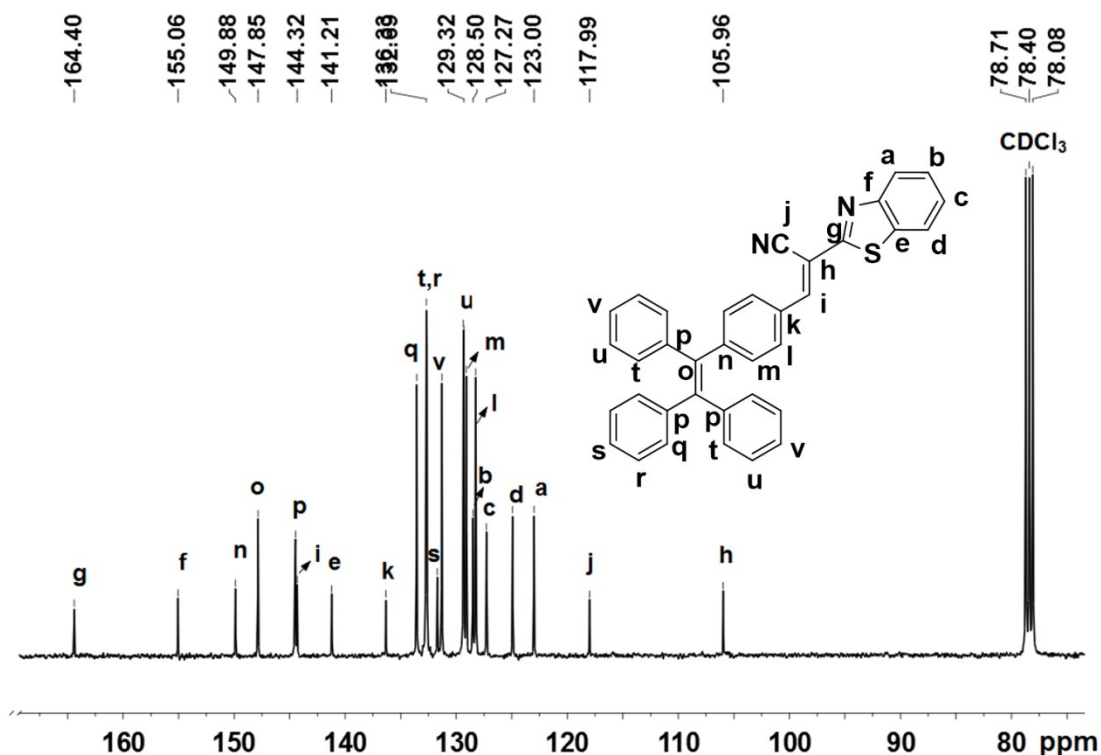

Fig. S2 <sup>13</sup>C-NMR spectrum of B-TPEAN.

Instrument:DSQ(Thermo)  
Ionization Method:EI  
D:\DSQ\DATA-LR\13\112805

11/28/2013 3:42:32 PM

Thi

112805 #95 RT: 2.45 AV: 1 NL: 4.75E5  
T: + c Full ms [45.00-800.00]

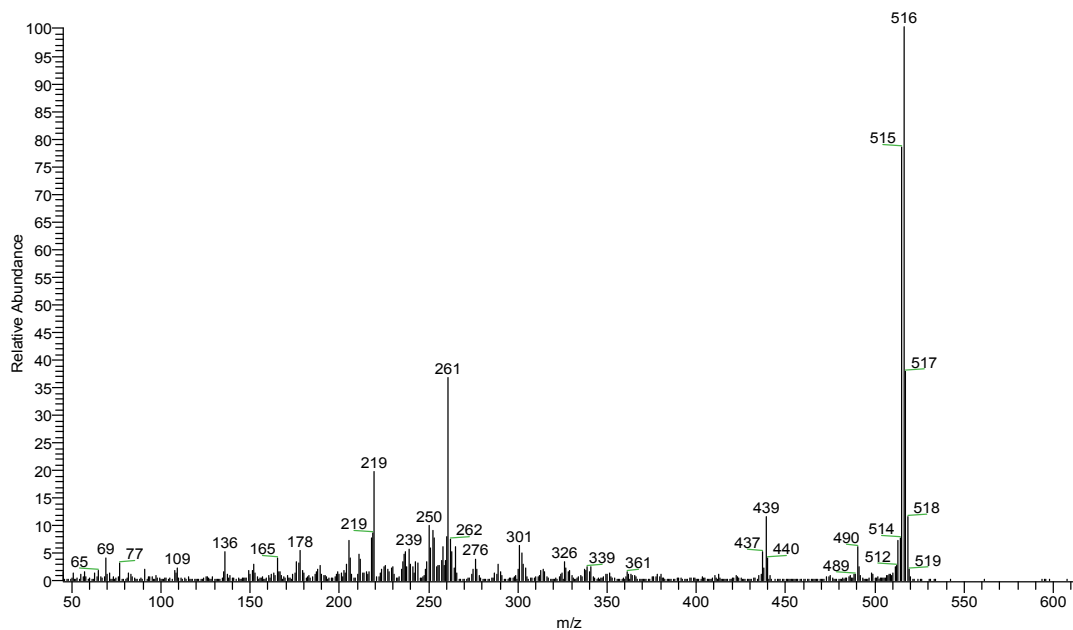

Fig. S3 MS spectrum of B-TPEAN.

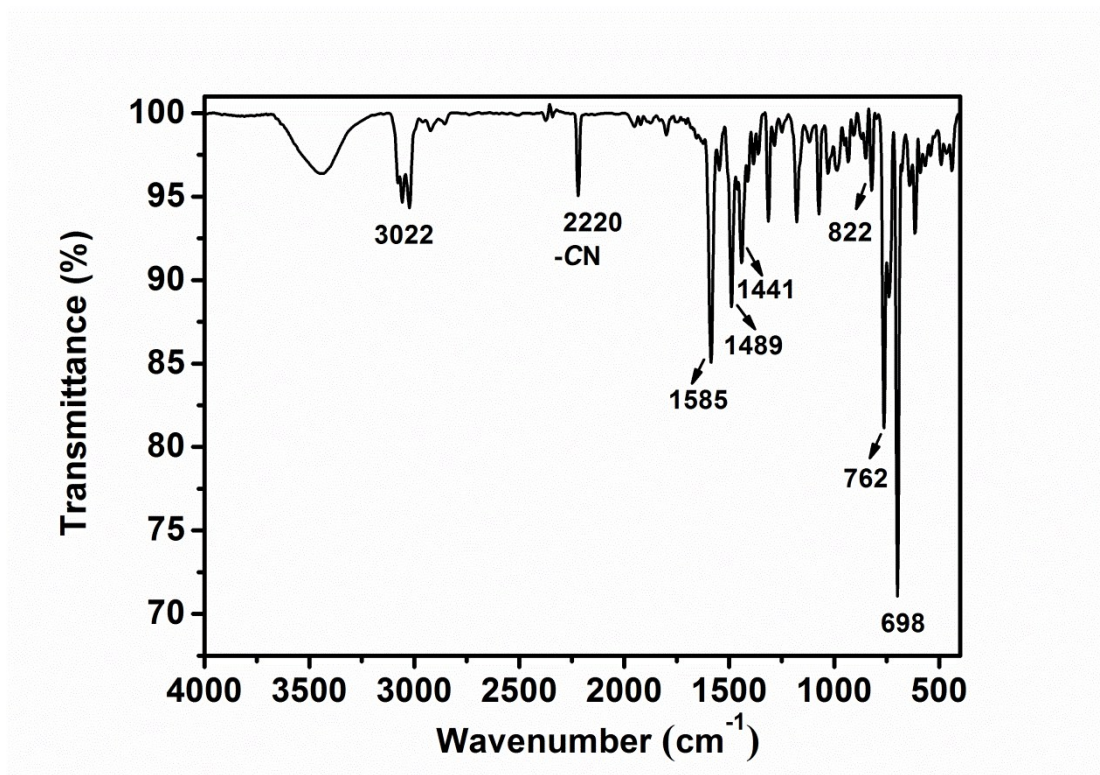

Fig. S4 FT-IR spectrum of B-TPEAN.

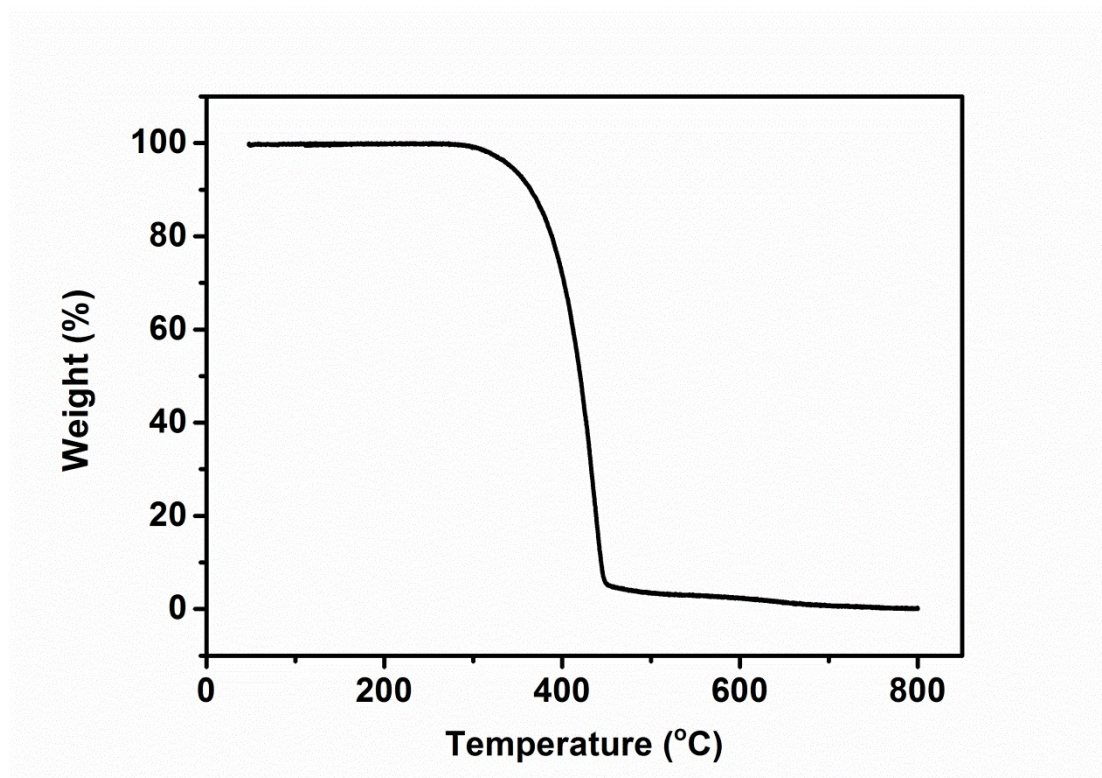

Fig. S5 TGA curve of B-TPEAN.
